# Supplementary material
Source: PubMed Central journal article supplement (PMC3013543)

# Supplementary Figure 1

## A

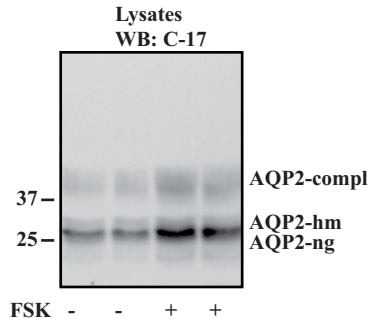

## B

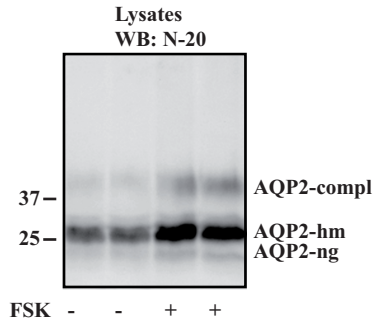

Supplement: ASN.2009111190_1.pdf [file ASN.2009111190_1.pdf]

# Supplementary Figure 2

## A

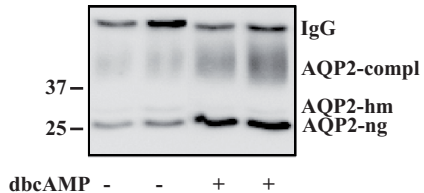

## B

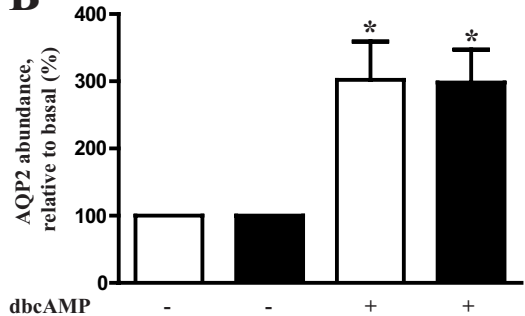

Supplement: ASN.2009111190_2.pdf [file ASN.2009111190_2.pdf]

### Supplementary Figure 3

**A**

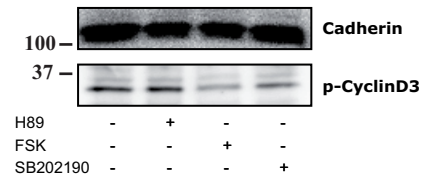

Supplement: ASN.2009111190_3.pdf [file ASN.2009111190_3.pdf]
